# Supplementary material for: Non-hydroxyl radical mediated photochemical processes for dye degradation
Source: Royal Society of Chemistry journal article supplement (doi:10.1039/c3cp54765e), 2014-01-01
Supplement: c3cp54765e1.pdf [file c3cp54765e1.pdf]

Electronic supplementary information

**Non-Hydroxyl Radical Mediated Photochemical Processes for Dye Degradation**

Xitong Liu, Xiaojie Song, Shujuan Zhang\*, Mengshu Wang and Bingcai Pan

State Key Laboratory of Pollution Control and Resource Reuse, School of the  
Environment, Nanjing University, Nanjing, 210023, China

\* Corresponding author. Tel.: +86 25 8968 0389. E-mail address: sjzhang@nju.edu.cn.

This file contains 4 tables, 2 schemes and 7 figures.

**Tables:**

Table S1. Mobile phase gradient for the LC-MS/MS experiments.

Table S2. Degradation products of AO7 in the UV/diketone and UV/H<sub>2</sub>O<sub>2</sub> processes.

Table S3. Degradation products of MO in the UV/diketone and UV/H<sub>2</sub>O<sub>2</sub> processes.

Table S4. The toxicology of the three diketones and H<sub>2</sub>O<sub>2</sub>.

**Schemes:**

Scheme S1. Molecular structures of the three diketones and the four dyes.

Scheme S2. The picture and a schematic illustration of the photoreactor rig.

**Figures:**

Fig. S1. The light spectrum of the medium-pressure mercury lamp.

Fig. S2. Decoloration of MO in the UV/diketone and UV/H<sub>2</sub>O<sub>2</sub> processes.

Fig. S3. Decoloration of AR in the UV/diketone and UV/H<sub>2</sub>O<sub>2</sub> processes.

Fig. S4. Decoloration of RB in the UV/diketone and UV/H<sub>2</sub>O<sub>2</sub> processes.

Fig. S5. Effect of solution pH on the degradation of AO7 and MO in the UV/diketone  
and UV/H<sub>2</sub>O<sub>2</sub> processes.

Fig. S6. Effect of ethanol on the decoloration of AO7 in the UV/diketone and  
UV/H<sub>2</sub>O<sub>2</sub> processes.

Fig. S7. UV-Vis spectra of MO, diketones and the mixture of MO and diketones.

**Table S1.** Mobile phase gradient for the LC-MS/MS experiments.

| Time (min) | Flow (ml/min) | 0.1% HCOOH/H <sub>2</sub> O (%) | CH <sub>3</sub> OH (%) |
|------------|---------------|---------------------------------|------------------------|
| 0          | 0.2           | 90                              | 10                     |
| 38         | 0.2           | 10                              | 90                     |
| 42         | 0.2           | 90                              | 10                     |
| 55         | 0.2           | 90                              | 10                     |

**Table S2.** Degradation products of AO7 in the UV/diketone and UV/H<sub>2</sub>O<sub>2</sub> processes.

| No. | RT <sup>a</sup> | m/z | MS <sup>2</sup><br>fragments      | Detectability <sup>b</sup> |    |    |                               |
|-----|-----------------|-----|-----------------------------------|----------------------------|----|----|-------------------------------|
|     |                 |     |                                   | AA                         | BD | HD | H <sub>2</sub> O <sub>2</sub> |
| A1  | 7.36            | 172 | - <sup>c</sup>                    | √                          | √  | √  | ND                            |
| A2  | 9.20            | 173 | 146, 80                           | √                          | √  | √  | √                             |
| A3  | 13.64           | 214 | -                                 | √                          | √  | √  | ND                            |
| A4  | 8.22            | 189 | 125, 109                          | √                          | √  | √  | √                             |
| A5  | 30.30           | 343 | 325, 219, 170                     | √                          | √  | √  | ND                            |
| A6  | 32.05           | 391 | -                                 | ND                         | ND | ND | √                             |
| A7  | 39.92           | 427 | 410, 385, 370, 328, 283, 240, 172 | √                          | ND | ND | ND                            |
| A8  | 43.84           | 299 | 235, 219                          | √                          | √  | √  | √                             |

<sup>a</sup> RT: retention time. <sup>b</sup> √: detected, ND: not detectable. <sup>c</sup> -: not available.

**Table S3.** Degradation products of MO in the UV/diketone and UV/H<sub>2</sub>O<sub>2</sub> processes.

| No. | RT           | m/z | MS <sup>2</sup><br>fragments | Detected or not |    |    |                               |
|-----|--------------|-----|------------------------------|-----------------|----|----|-------------------------------|
|     |              |     |                              | AA              | BD | HD | H <sub>2</sub> O <sub>2</sub> |
| M1  | 7.36         | 172 | -                            | √               | ND | √  | ND                            |
| M2  | 9.20         | 173 | -                            | √               | √  | √  | √                             |
| M3  | 13.64        | 214 | 172, 150, 134                | √               | ND | √  | ND                            |
| M4  | 14.43        | 228 | 184, 171                     | √               | ND | √  | ND                            |
| M5  | 19.57        | 390 | 372, 213, 198                | √               | ND | ND | ND                            |
| M6  | 20.92        | 404 | 386, 362, 213, 198           | √               | ND | ND | ND                            |
| M6' | 24.98        | 404 | -                            | ND              | √  | √  | ND                            |
| M7  | 20.61        | 362 | -                            | √               | ND | ND | ND                            |
| M8  | 23.49, 25.01 | 320 | 304                          | √               | √  | √  | √                             |
| M9  | 35.95        | 360 | 316, 296, 156                | √               | ND | ND | ND                            |
| M10 | 37.20        | 290 | 275, 226, 156                | √               | √  | √  | √                             |
| M11 | 39.95        | 346 | 317, 282, 156                | √               | ND | √  | ND                            |
| M12 | 0.99         | 193 | -                            | √               | ND | ND | ND                            |

**Table S4.** The toxicology of the three diketones and H<sub>2</sub>O<sub>2</sub>.

|                                                   | BD* <sup>a</sup> | AA <sup>b</sup> | HD <sup>c</sup> | H <sub>2</sub> O <sub>2</sub> <sup>d</sup> |
|---------------------------------------------------|------------------|-----------------|-----------------|--------------------------------------------|
| LD <sub>50</sub> (oral, rat) (mg/kg)              | 1580             | 570-760         | 1600            | 910                                        |
| LD <sub>50</sub> (dermal, rabbit) (mg/kg)         | > 5000           | 790-1370        | N.A.            | > 2000                                     |
| LC <sub>50</sub> (inhalation, rat, 4 hour) (mg/L) | 2.25-5.2         | 5.1             | 2000            | 2                                          |

\*: BD is a byproduct of fermentation. It occurs naturally in alcoholic beverages and is used as additive for some foods to impart a buttery flavor.

<sup>a</sup> *Diacetyl*; MSDS No. D3634 [online]; Sigma-Aldrich: Saint Louis, MO, 18 Mar, 2013.

<http://www.sigmaaldrich.com/MSDS/MSDS/DisplayMSDSPage.do?country=US&language=en&productNumber=D3634&brand=SIGMA&PageToGoToURL=http%3A%2F%2Fwww.sigmaaldrich.com%2Fcatalog%2Fproduct%2Fsigma%2Fd3634%3Flang%3Den> (accessed September 16, 2013)

<sup>b</sup> *Acetylacetone*; MSDS No.00900 [online]; Sigma-Aldrich: Saint Louis, MO, 19 Sept 2012.

<http://www.sigmaaldrich.com/MSDS/MSDS/DisplayMSDSPage.do?country=US&language=en&productNumber=00900&brand=FLUKA&PageToGoToURL=http%3A%2F%2Fwww.sigmaaldrich.com%2Fcatalog%2Fproduct%2Ffluka%2F00900%3Flang%3Den> (accessed September 16, 2013).

<sup>c</sup> *Acetylacetone*, MSDS No. 00770[online]; Sigma-Aldrich: Saint Louis, MO, 13 Jul 2012.

<http://www.sigmaaldrich.com/MSDS/MSDS/DisplayMSDSPage.do?country=US&language=en&productNumber=00770&brand=FLUKA&PageToGoToURL=http%3A%2F%2Fwww.sigmaaldrich.com%2Fcatalog%2Fproduct%2Ffluka%2F00770%3Flang%3Den> (accessed September 16, 2013).

<sup>d</sup> *Hydrogen Peroxide*, MSDS No. H1009 [online]; Sigma-Aldrich: Saint Louis, MO, 26 Jan 2013.

<http://www.sigmaaldrich.com/MSDS/MSDS/PleaseWaitMSDSPage.do?language=&country=US&brand=SIGMA&productNumber=H1009&PageToGoToURL=http://www.sigmaaldrich.com/catalog/product/sigma/h1009?lang=en&region=US> (accessed September 16, 2013).

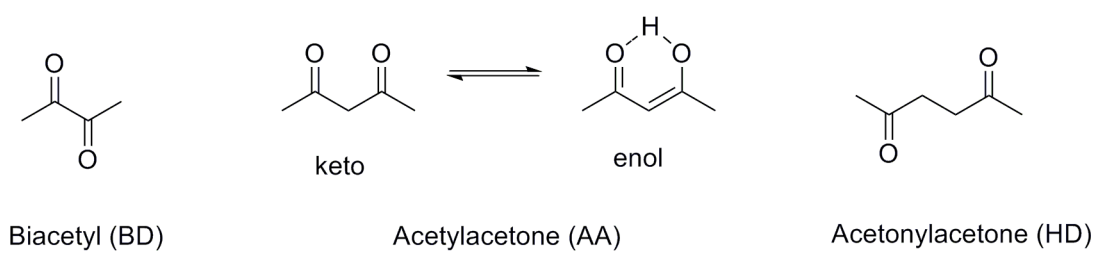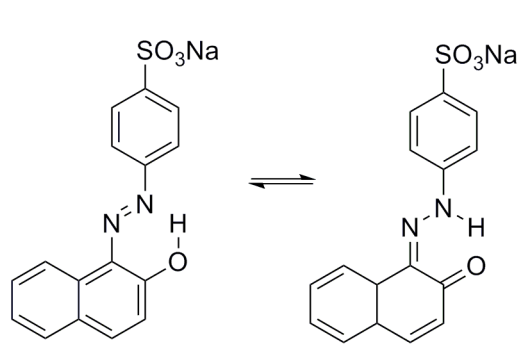

Acid Orange 7 (AO7)

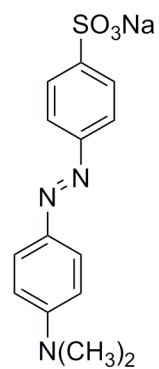

Methyl Orange (MO)

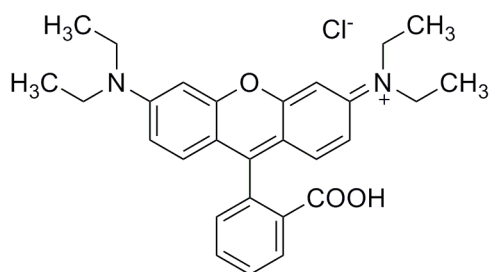

Rhodamine B (RB)

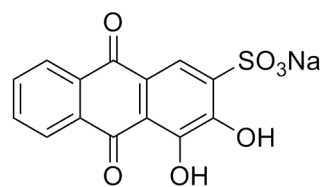

Alizarin Red (AR)

**Scheme S1.** Molecular structures of the three diketones and the four dyes.

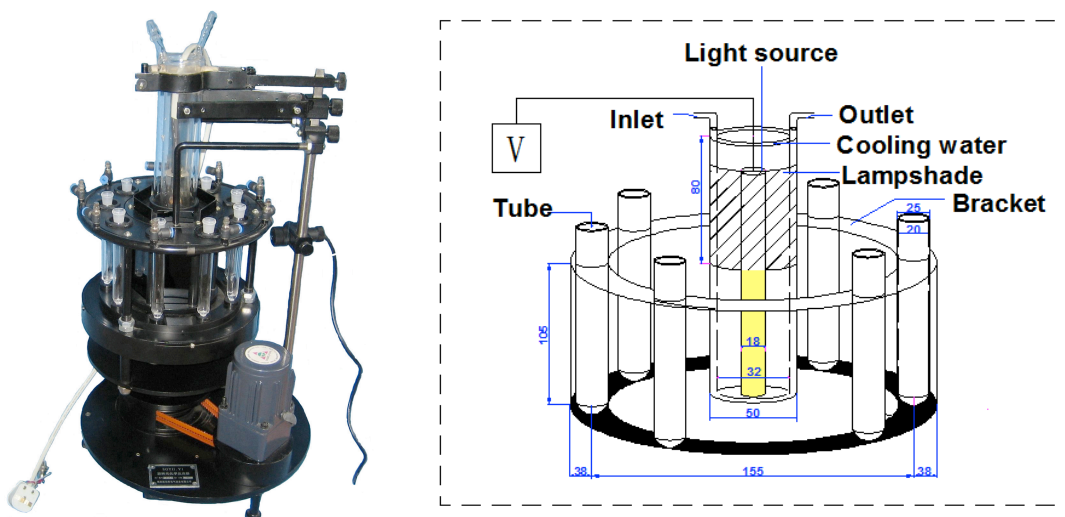

**Scheme S2.** The picture and a schematic illustration of the photoreactor rig.

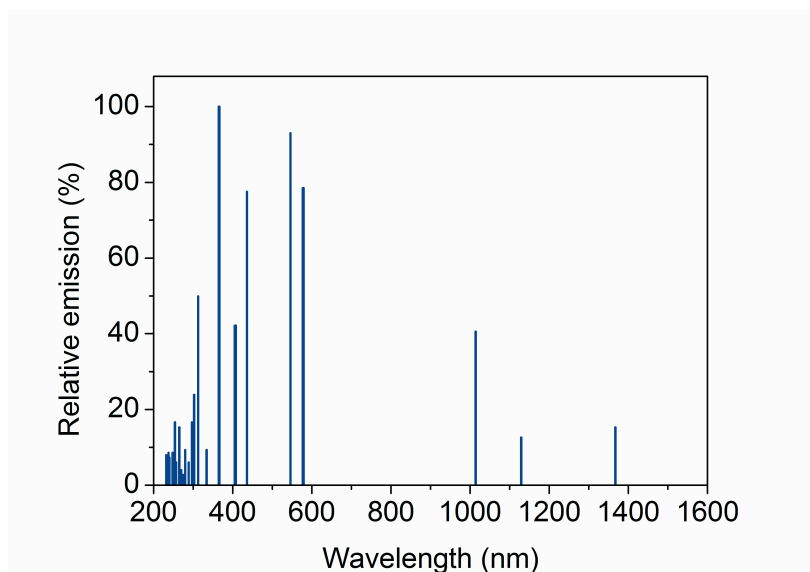

**Fig. S1.** The light spectrum of the medium-pressure mercury lamp.

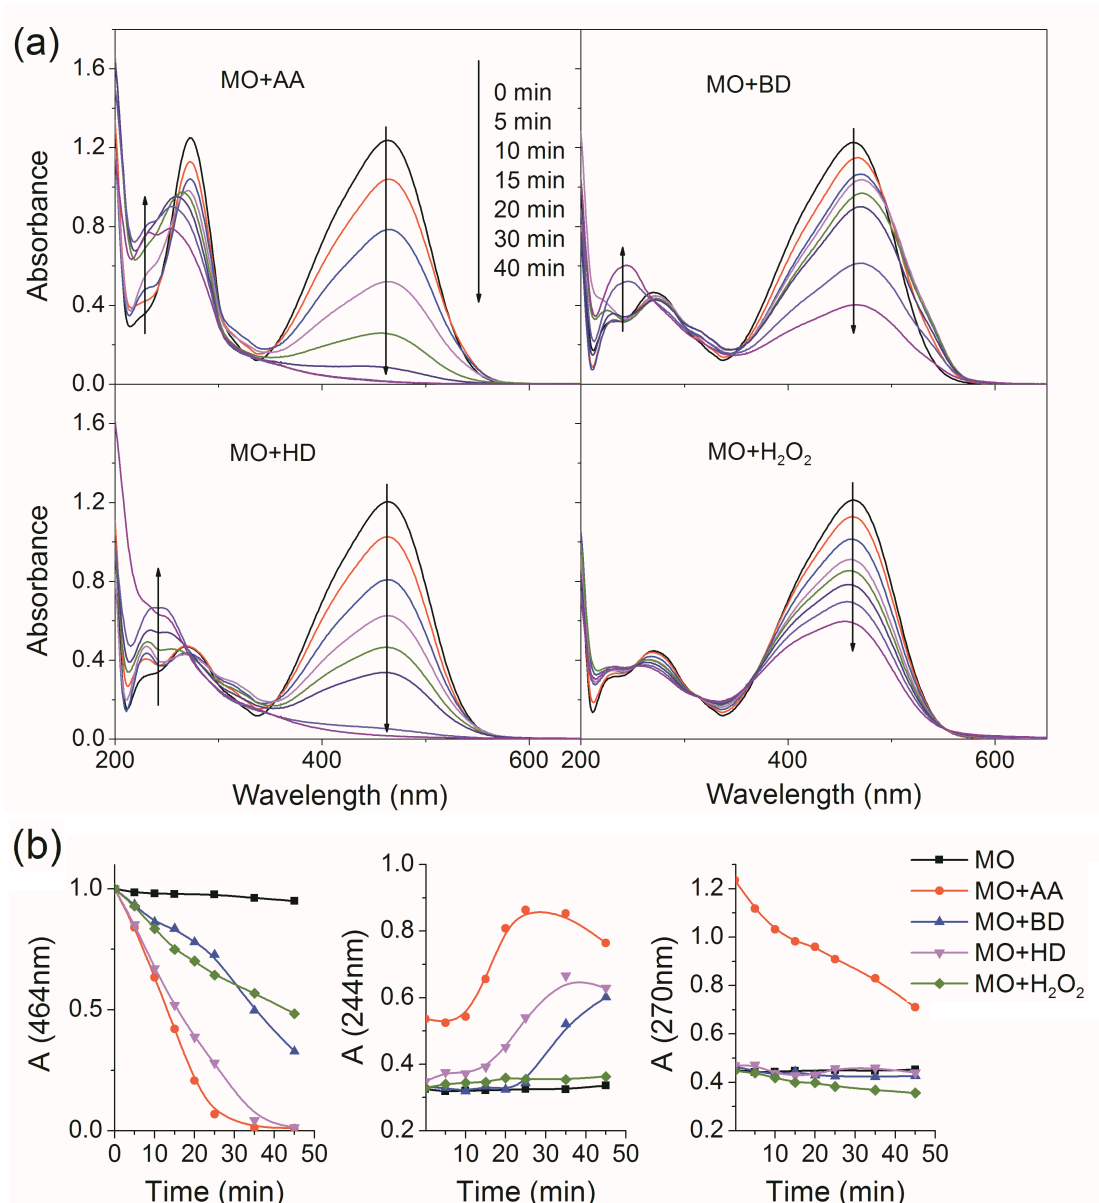

**Fig. S2.** (a) Evolution of the UV-Vis spectra of MO in the UV/diketone and UV/H<sub>2</sub>O<sub>2</sub> processes. (b) Intensities of the three main UV/Vis absorption peaks of MO plotted as a function of irradiation time. The absorption intensity at 464 nm was normalized, and the intensities at 244 and 270 nm were the original absorption values. [MO] = 0.12 mM, [Activator] = 1 mM. Light intensity: 7.0 mW cm<sup>-2</sup>. Samples were diluted for 2.5 times prior to analysis.

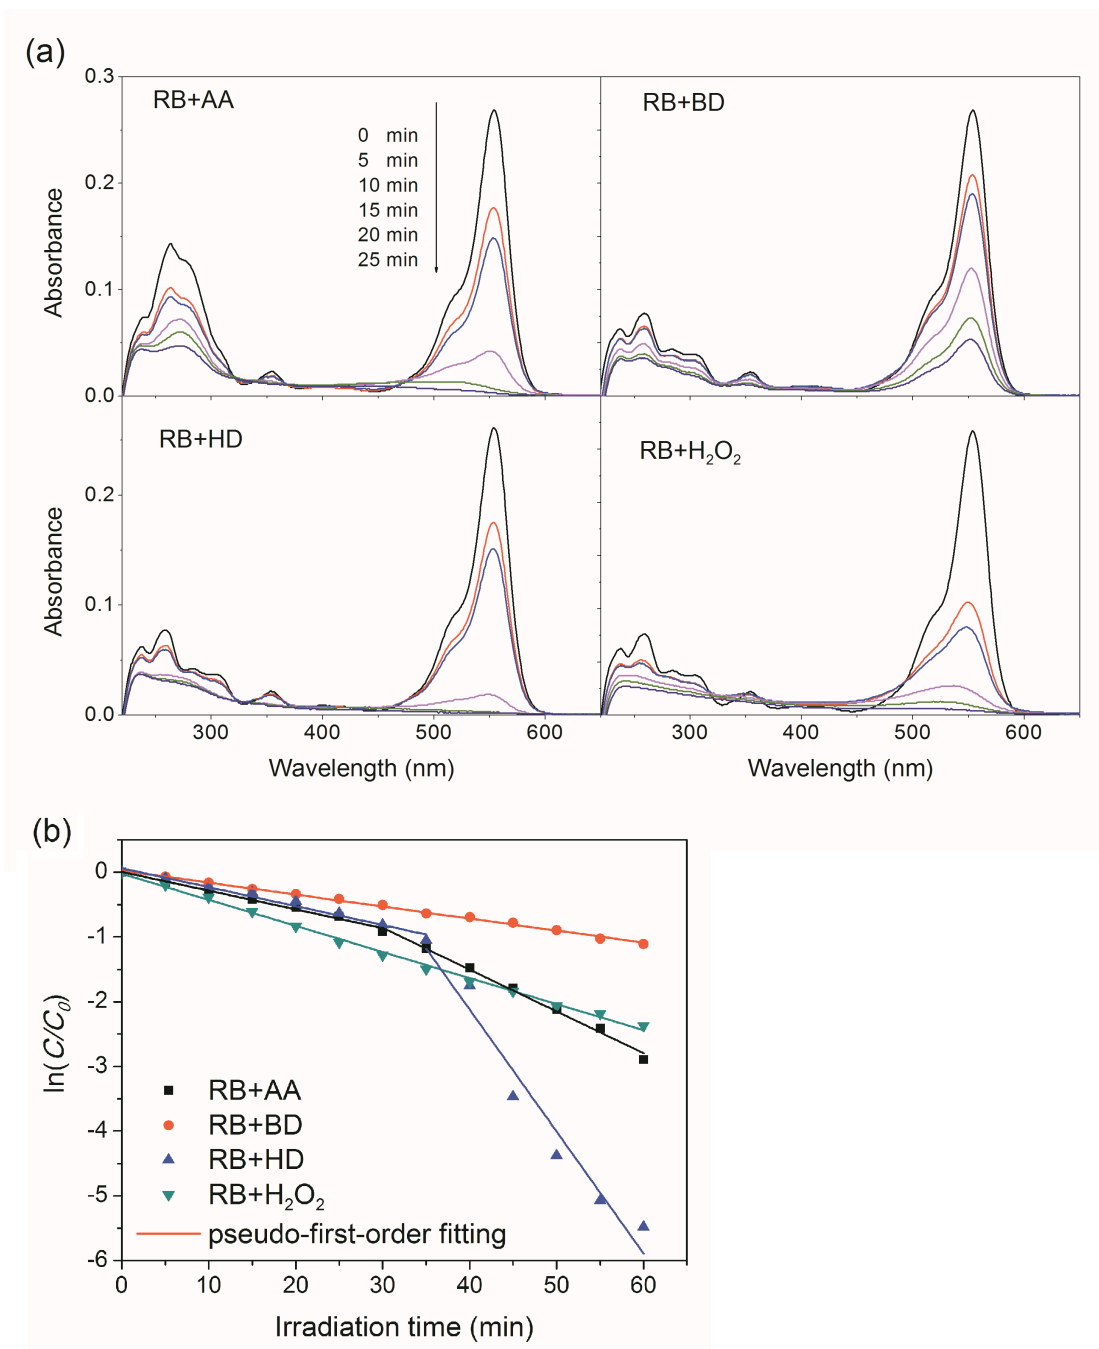

**Fig. S3.** (a) Evolution of the UV-Vis spectra of RB in the UV/diketone and UV/H<sub>2</sub>O<sub>2</sub> processes. [RB] = 0.03 mM, [Activator] = 0.5 mM. (b) Degradation kinetics of RB in the UV/diketone and UV/H<sub>2</sub>O<sub>2</sub> processes. [RB] = 0.05 mM, [Activator] = 0.5 mM.



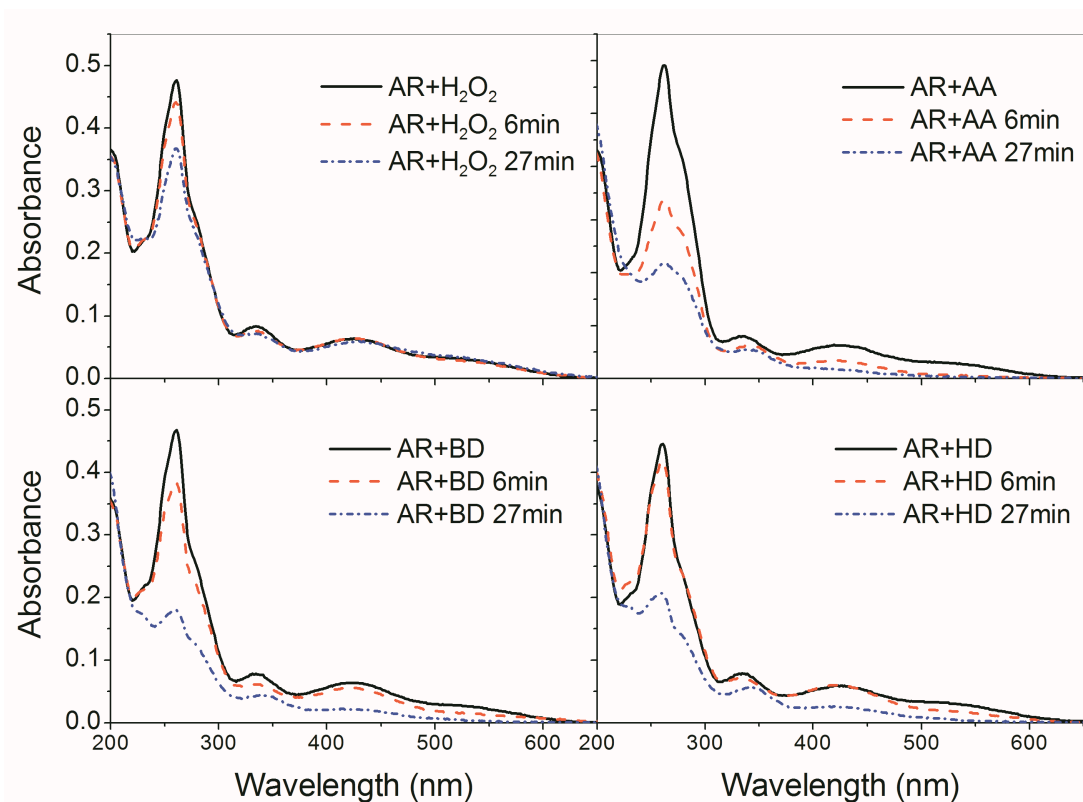

**Fig. S4.** Evolution of the UV-Vis spectra of AR in the UV/diketone and UV/H<sub>2</sub>O<sub>2</sub> processes. [AR] = 0.1 mM, [Activator] = 0.5 mM, Light intensity: 5.3 mW cm<sup>-2</sup>. Samples were diluted for 5 times prior to analysis.

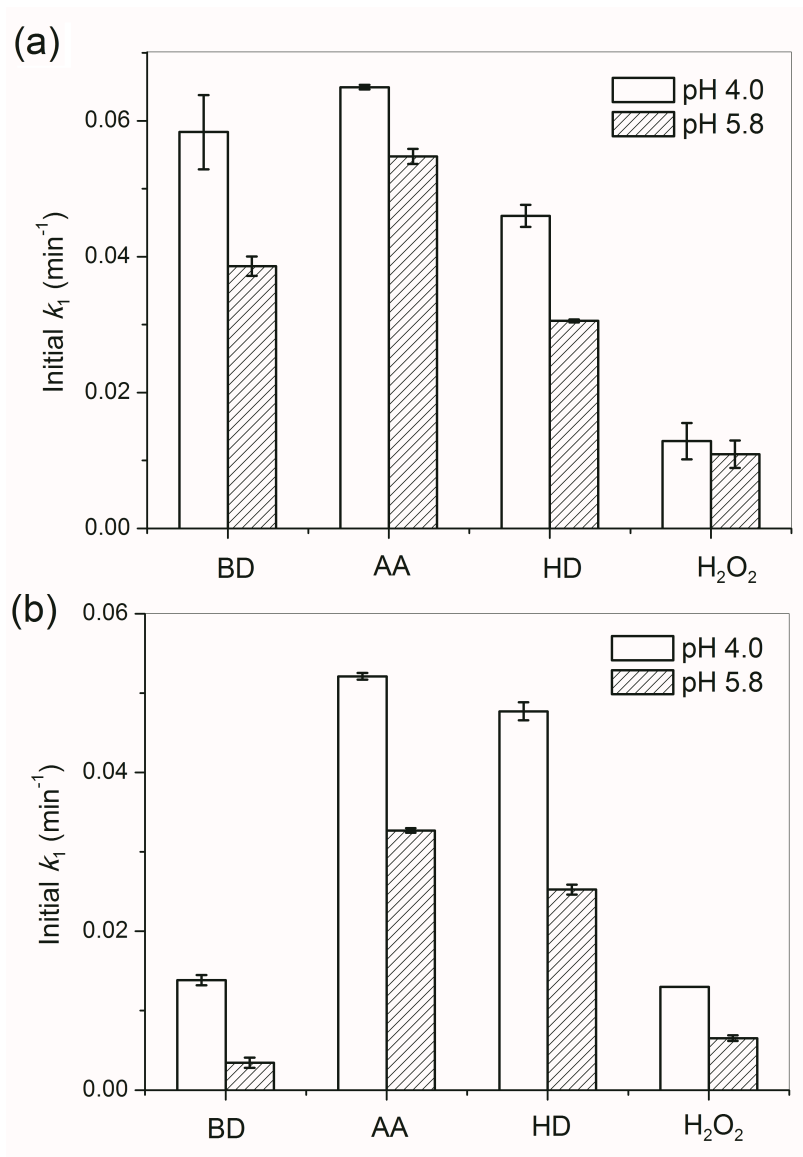

**Fig. S5.** The initial pseudo-first order decoloration rate constants of AO7 (a) and MO (b) in 0.2 mol/L NaAc/HAc buffer solutions of pH 4.0 and 5.8. (a)  $[\text{AO7}] = 0.16 \text{ mM}$ ,  $[\text{Activator}] = 0.5 \text{ mM}$ . (b)  $[\text{MO}] = 0.12 \text{ mM}$ ,  $[\text{Activator}] = 1 \text{ mM}$ . Error bar represents the standard deviation of duplicates.

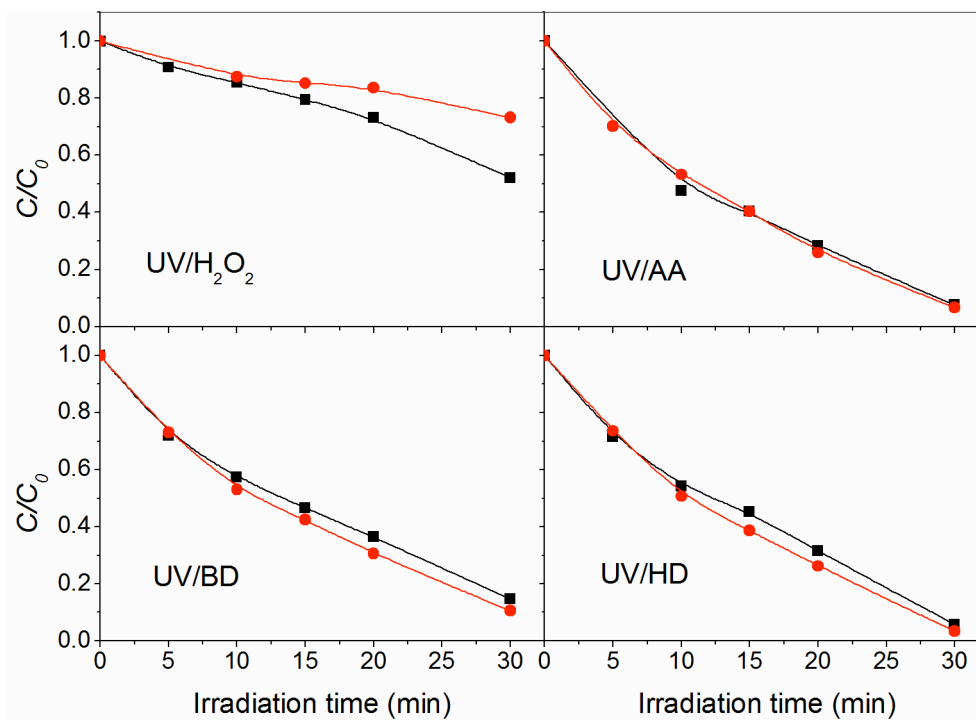

**Fig. S6.** Effect of ethanol on the decoloration of AO7 in the UV/diketone and UV/ $H_2O_2$  processes (Black: no ethanol, red: with ethanol).

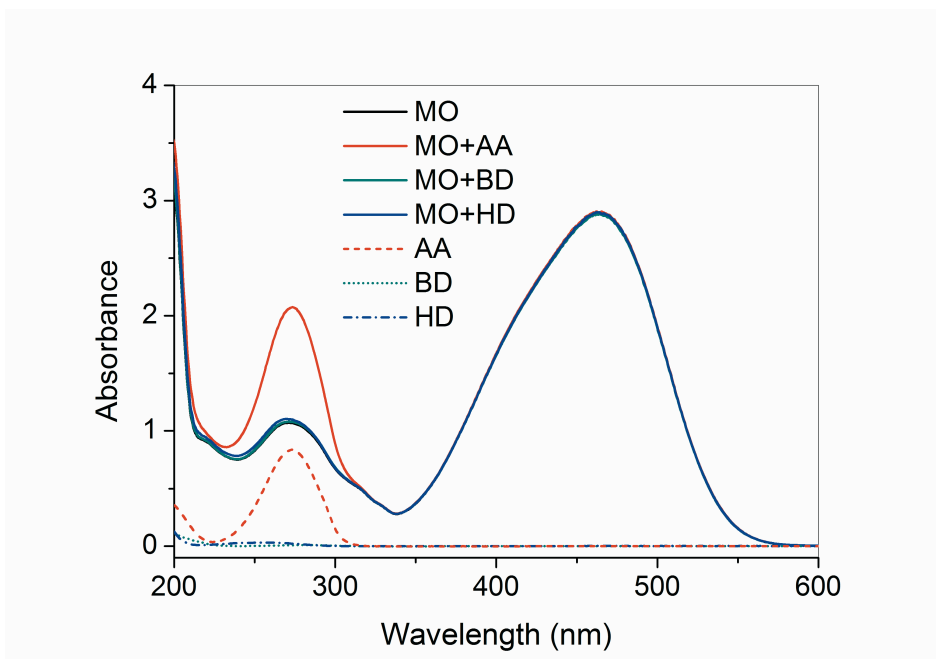

**Fig. S7.** UV-Vis spectra of MO, diketones and the mixture of MO and diketones.

\*: The spectra of MO-diketone solution were exactly the sum of the individual spectra of MO and diketones.
